# Supplementary material for: Drice restrains Diap2-mediated inflammatory signalling and intestinal inflammation
Source: PubMed Central journal article supplement (PMC8738736; doi:10.1038/s41418-021-00832-w), 2021-07-14

## Supplementary figures

### Drice restrains Diap2-mediated inflammatory signalling and intestinal inflammation

Christa Kietz, Aravind K Mohan, Vilma Pollari, Ida-Emma Tuominen, Paulo S Ribeiro, Pascal Meier, Annika Meinander

Kietz et al. Supplementary Figure 1

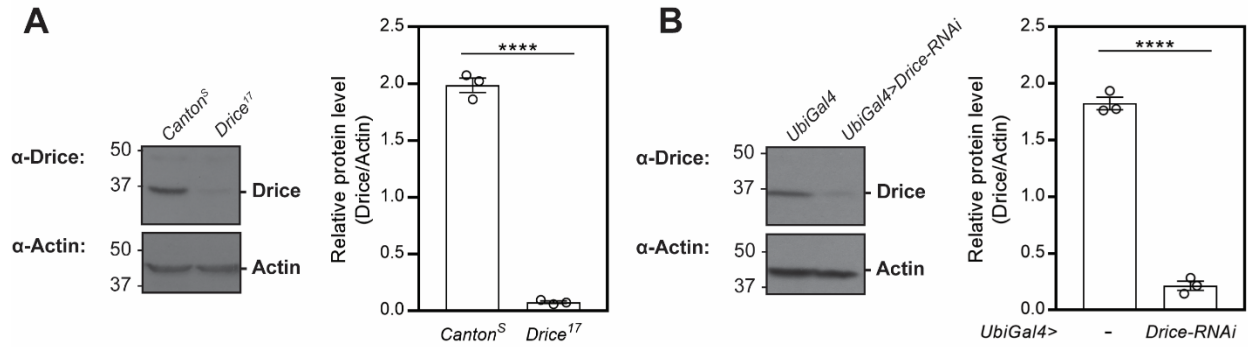

Kietz et al. Supplementary Figure 2

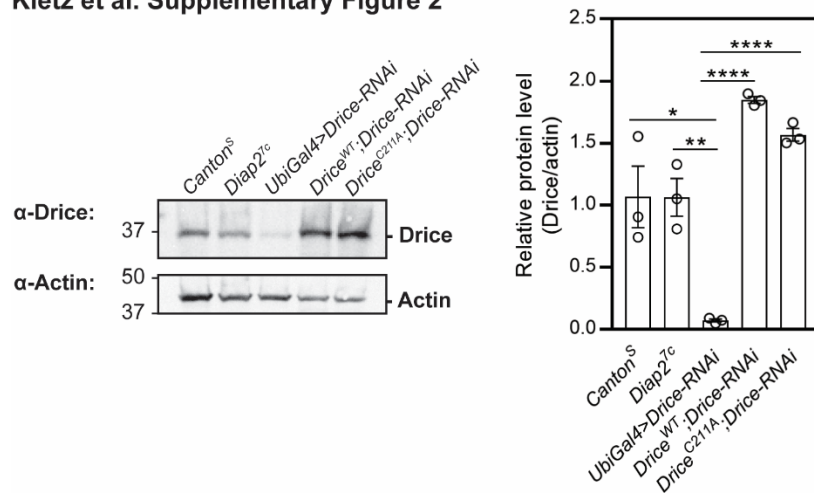

Kietz et al. Supplementary Figure 3

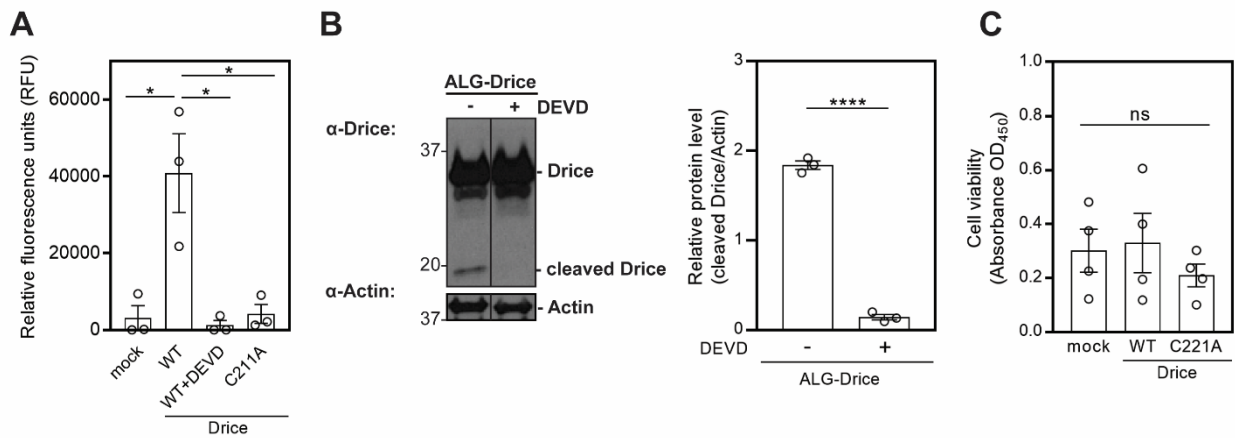

Kietz et al. Supplementary Figure 4

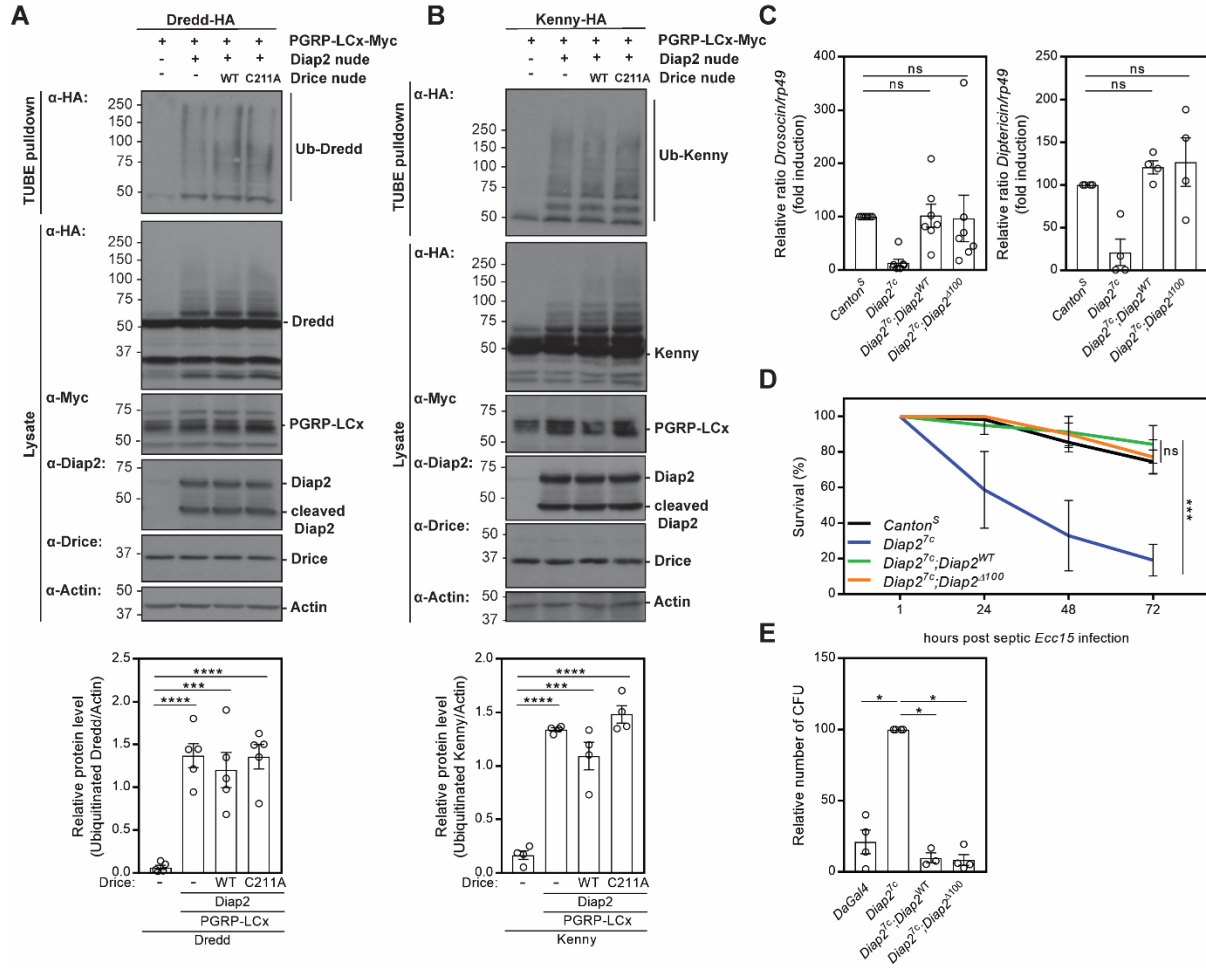

Kietz et al. Supplementary Figure 5

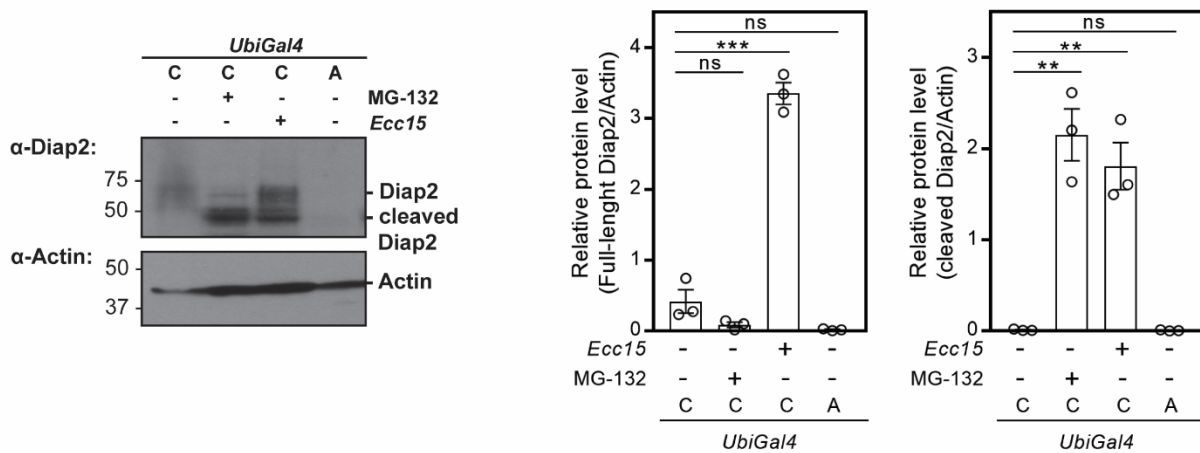

Supplement: 41418_2021_832_MOESM1_ESM.pdf [file 41418_2021_832_MOESM1_ESM.pdf]
